# Supplementary material for: Uniform magnesium silicate hollow spheres as high drug-loading nanocarriers for cancer therapy with low systemic toxicity
Source: Royal Society of Chemistry journal article supplement (doi:10.1039/c3dt50659b), 2013-01-01
Supplement: c3dt50659b.pdf [file c3dt50659b.pdf]

## Supporting Information for

# Uniform Magnesium Silicate Hollow Spheres as High Drug-Loading Nanocarriers for Cancer Therapy with Low Systemic Toxicity

*Baixiang Wang,<sup>\*,a</sup> Weiyan Meng,<sup>b</sup> Ming Bi,<sup>c</sup> Yuxin Ni,<sup>b</sup> Qing Cai,<sup>b</sup> and Jingyun*

*Wang<sup>\*\*,a</sup>*

<sup>a</sup> Department of Prosthodontics, School of Stomatology, Jilin University, Changchun, 130021 (P. R. China).

Fax: (+86) 0431-88796018

Tel: (+86) 0431-88796018

E-mail: *baixiangwang1@gmail.com*; *jlccjingyun@sina.com*

<sup>b</sup> Department of Implantology, School of Stomatology, Jilin University, Changchun, 130021 (P. R. China).

<sup>c</sup> Department of Comprehensive Treatment, School of Stomatology, Jilin University, Changchun, 130021 (P. R. China).

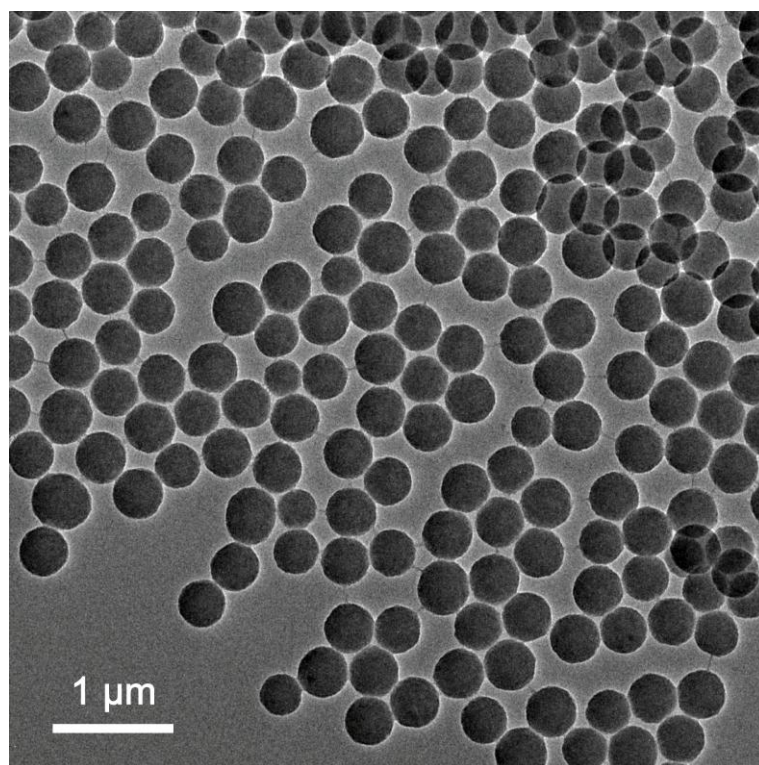

**Figure S1.** TEM image of SiO<sub>2</sub> colloidal spheres.

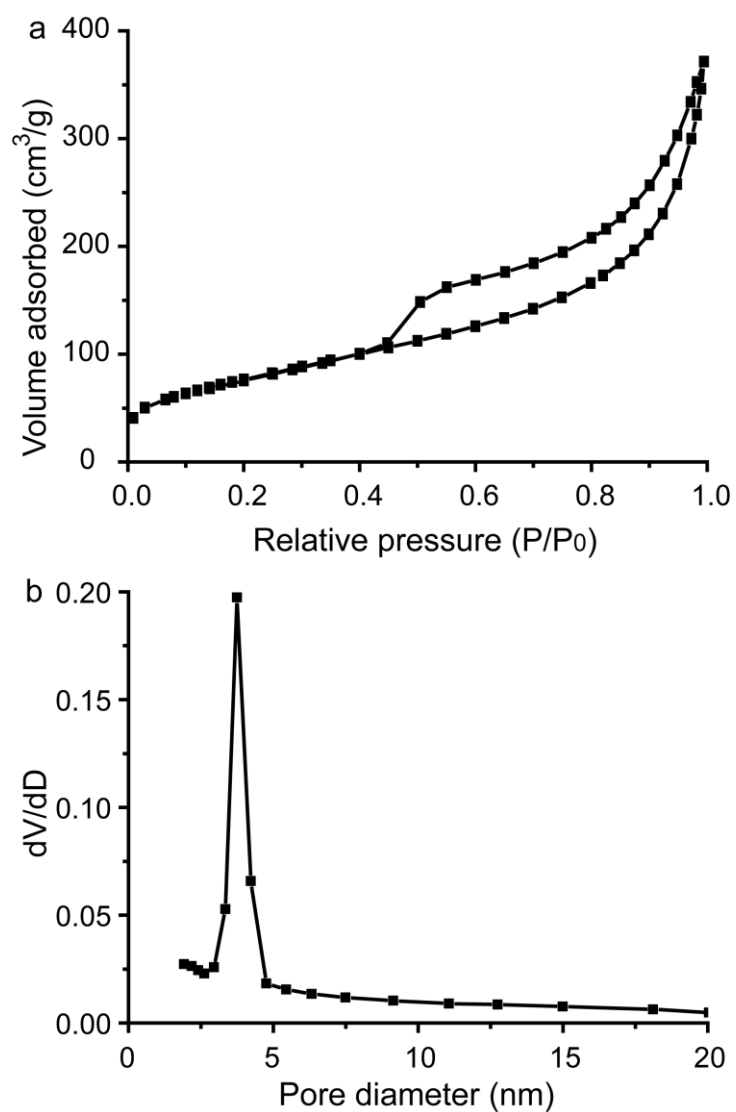

**Figure S2.** Nitrogen adsorption-desorption isotherms of MgSiO<sub>3</sub> hollow spheres (a) and pore size distribution from adsorption branch (b).

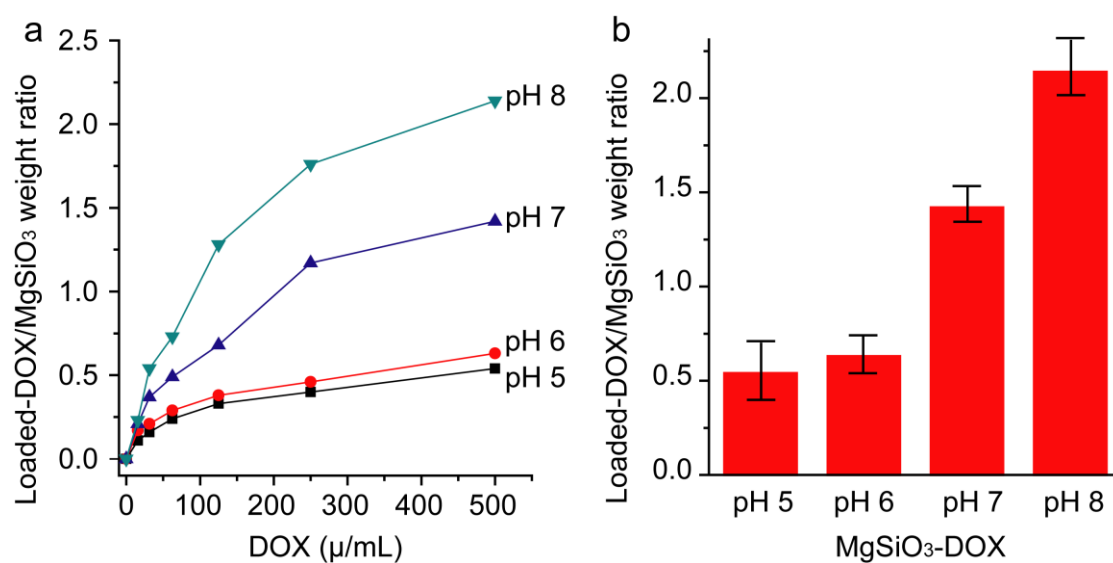

**Figure S3.** Quantification of DOX loading at different pH values upon different DOX concentrations (a) and histogram analysis with three independent experiments (b). Higher drug loading was achieved at increased pH.

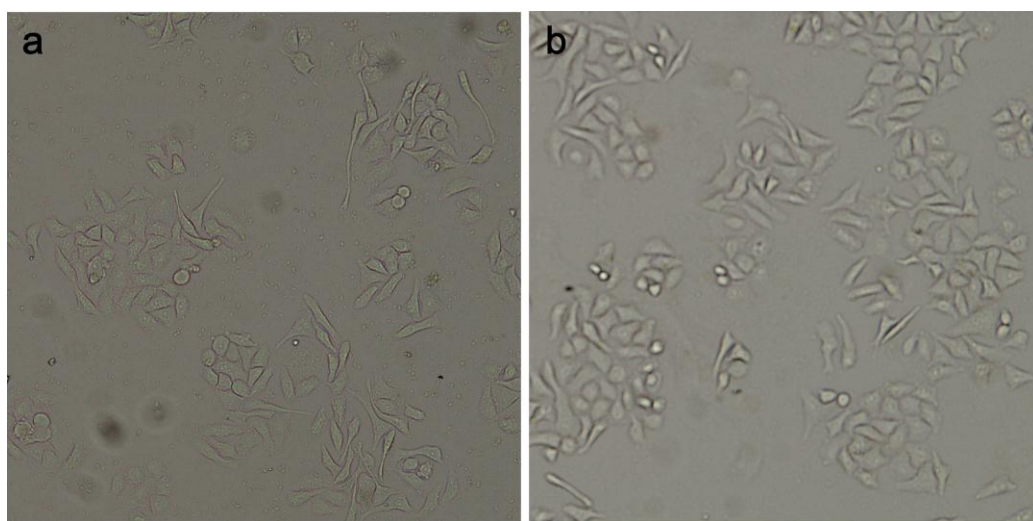

**Figure S4.** Amplificatory images: without nanoparticles (a) and with nanoparticles (b).

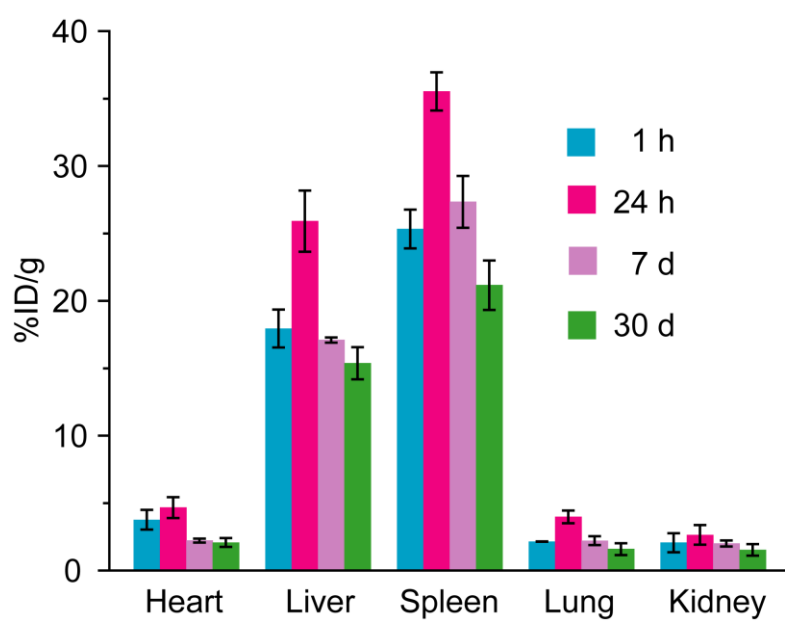

**Figure S5.** Time-dependent biodistribution of MgSiO<sub>3</sub> hollow spheres in mice.

**Table S1.** Exact value of hemolysis percentage upon MgSiO<sub>3</sub> hollow spheres with different concentrations.

| Concentrations ( $\mu\text{g MgSiO}_3 \text{ mL}^{-1}$ ) | Value of hemolysis (%) |
|----------------------------------------------------------|------------------------|
| D. I. Water                                              | 100                    |
| PBS                                                      | 0                      |
| 12.5                                                     | -0.012                 |
| 25                                                       | 0.136                  |
| 50                                                       | 0.2593                 |
| 100                                                      | 0.509                  |
| 200                                                      | 0.781                  |

**Table S2.** Pathological inflammatory responses of various viscera 30 d after intravenous administration of MgSiO<sub>3</sub> hollow spheres.

| Samples | Grade of<br>Inflammation | Lymphocytes | Macrophages | Neutrophils | Eosinophils |
|---------|--------------------------|-------------|-------------|-------------|-------------|
| Heart   | Low                      | +-          | +-          | +-          | +-          |
| Liver   | Low                      | +           | +           | +           | +-          |
| Spleen  | Low                      | +           | +           | +           | +-          |
| Lung    | Low                      | +-          | +-          | +-          | +-          |
| Kidney  | Low                      | +-          | +-          | +-          | +-          |



**Table S3.** Hematology analysis and blood biochemical assay 30 days after intravenous administration of MgSiO<sub>3</sub> hollow spheres.

| Test                                                | Unit                  | Control group (mean ± sd) | Treatment group (mean ± sd) |
|-----------------------------------------------------|-----------------------|---------------------------|-----------------------------|
| blood cell count (WBC)                              | × 10 <sup>9</sup> /L  | 9.6 ± 2.1                 | 9.4 ± 1.6                   |
| red cell count (RBC)                                | × 10 <sup>12</sup> /L | 9.8 ± 2.7                 | 9.1 ± 2.3                   |
| hemoglobin (HGB)                                    | g/L                   | 167.7 ± 21.8              | 172.1 ± 34.8                |
| mean corpuscular hemoglobin<br>(MCH)                | pg                    | 16.3 ± 1.9                | 16.1 ± 4.2                  |
| mean corpuscular hemoglobin<br>concentration (MCHC) | g/L                   | 330 ± 25.4                | 320 ± 27.9                  |
| alanine aminotransferase<br>(ALT)                   | U/L                   | 49.5 ± 6.5                | 45.6 ± 8.4                  |
| aspartate aminotransferase<br>(AST)                 | U/L                   | 152.4 ± 26.5              | 165.3 ± 33.4                |
| blood urea nitrogen (BUN)                           | × 10 <sup>6</sup> /μL | 7.9 ± 1.3                 | 8.7 ± 2.1                   |
| plasma creatinine (CRE)                             | × 10 <sup>3</sup> /μL | 20.8 ± 2.8                | 25.6 ± 3.7                  |
